# Supplementary material
Source: PubMed Central journal article supplement (PMC4244647)

Supplemental Figure 1. Study Design of *FinnTwin12*

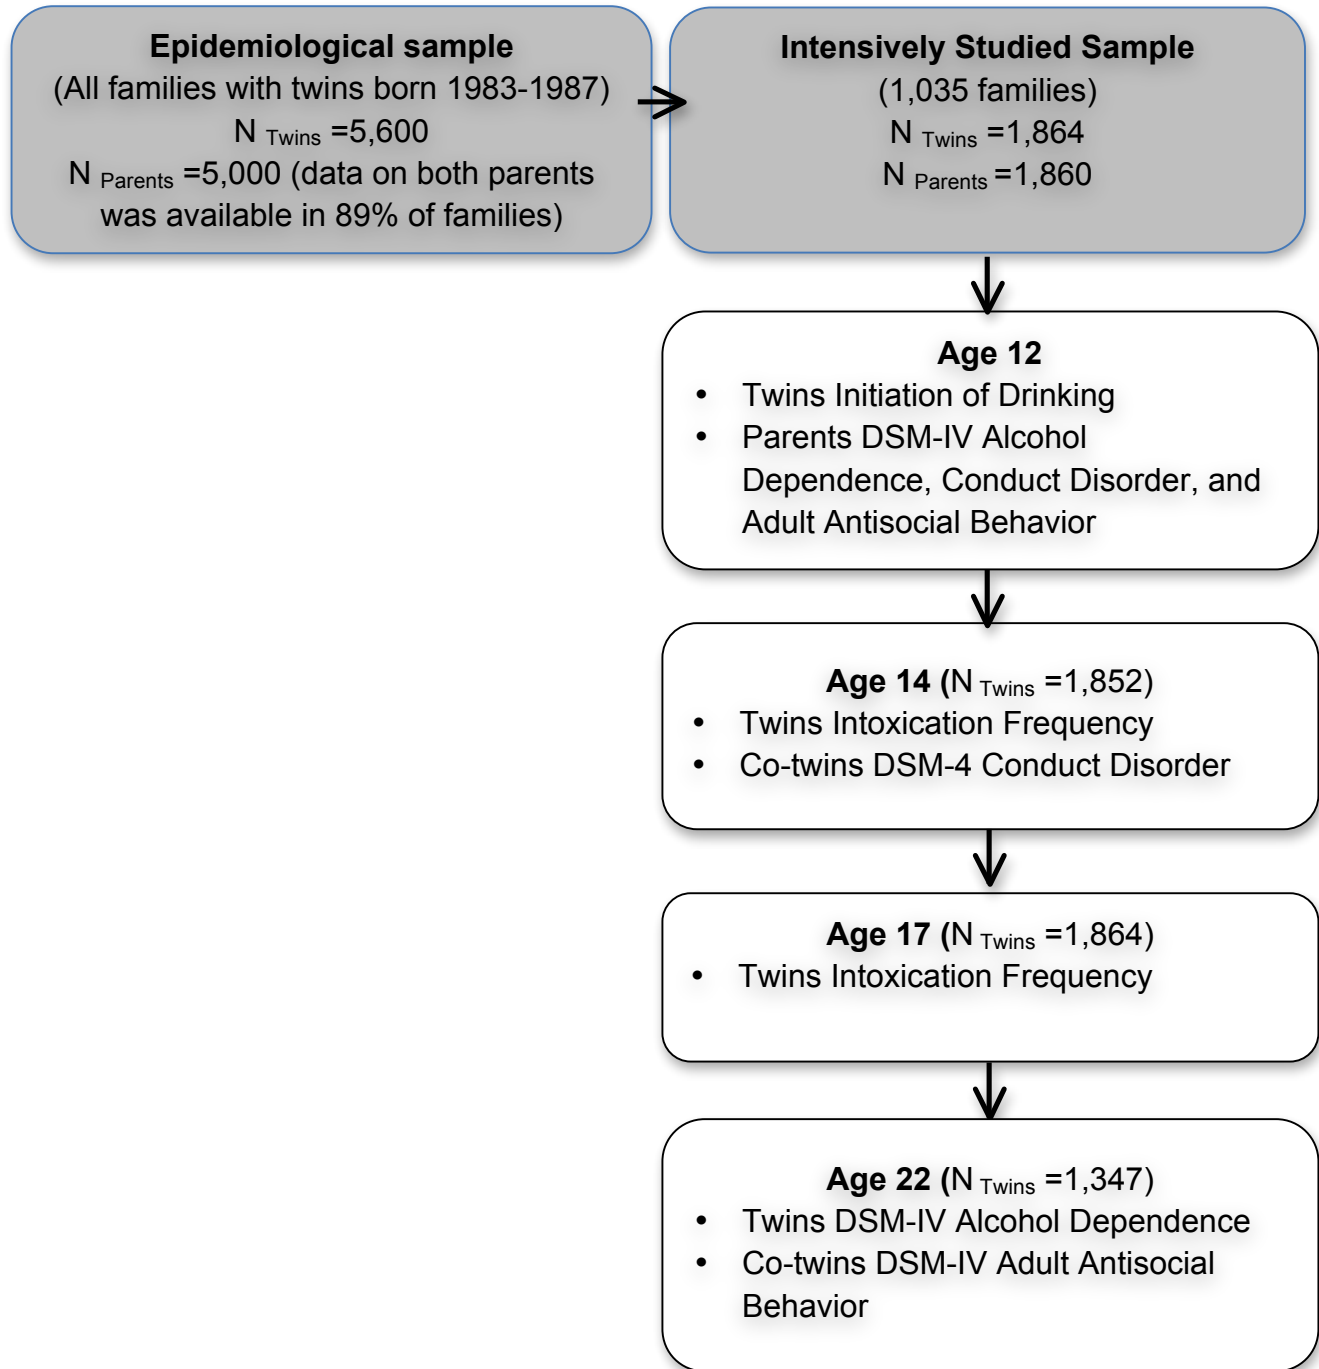

Supplement: NIHMS626811-supplement-Supp_FigureS1.pdf [file NIHMS626811-supplement-Supp_FigureS1.pdf]
